# Supplementary material for: Effect-Directed Profiling of Strawberry Varieties and Breeding Materials via Planar Chromatography and Chemometrics
Source: MDPI journal article supplement (doi:10.3390/molecules27186062), 2022-09-16
Supplement: s1 [file s1]

## Supplementary information

### Effect-directed profiling of strawberry varieties and breeding materials via planar chromatography and chemometrics

Petar Ristivojević <sup>o1</sup>, Nevena Lekić<sup>o2</sup>, Ilija Cvijetić<sup>1</sup>, Đurđa Krstić <sup>1</sup>, Filip Andrić <sup>1</sup>,  
Dušanka Milojković-Opsenica <sup>1</sup> and Gertrud E. Morlock <sup>3, \*</sup>

<sup>1</sup> Chair of Analytical Chemistry & Center of Excellence for Molecular Food Sciences, Faculty of Chemistry, University of Belgrade, Studentski trg 12-16, 11158 Belgrade, Serbia;  
ristivojevic@chem.bg.ac.rs (P.R.); ilija@chem.bg.ac.rs (I.C.); djurdjakrstic@chem.bg.ac.rs (Đ.K.); andric@chem.bg.ac.rs (F.A.); dusankam@chem.bg.ac.rs (D.M.-O.)

<sup>2</sup> Faculty of Agriculture, University of Belgrade, Nemanjina 6, Zemun, 11080 Belgrade, Serbia;  
nevena.momirovic@agrif.bg.ac.rs

<sup>3</sup> Chair of Food Science, Institute of Nutritional Science, and Interdisciplinary Research Center, Justus Liebig University Giessen, Heinrich-Buff-Ring 26-32, 35392 Giessen, Germany

\* Correspondence: gertrud.morlock@uni-giessen.de

† Equal contribution.

## Content

**Table S1.** Bond dissociation enthalpy (BDE) and ionization potential (IP) given in kJ/mol calculated for pelargonidin-3-*O*-glucoside monoanion at M062X/6-31+g(d,p) level in the gas phase, and using SMD solvation models of water and pentyl ethanoate.

**Figure S1.** HPTLC profiles of 17 samples of six strawberry cultivars after (a) *Bacillus subtilis* bioassay, (b) acetylcholinesterase and (c) butyrylcholinesterase inhibition assays; respective positive controls of each assay are evident at the upper plate part

**Figure S2.** HPTLC densitogram of the absorbance measurement at 500 nm of 17 samples of six strawberry cultivars

**Figure S3.** PCs score plots based on chromatogram at white light illumination (a), chromatogram at 254 nm absorbance (b), DPPH• scavenging autogram (c), and *Aliivibrio fischeri* bioautogram (d)

**Table S1.** Bond dissociation enthalpy (BDE) and ionization potential (IP) given in kJ/mol calculated for pelargonidin-3-*O*-glucoside monoanion at M062X/6-31+g(d,p) level in the gas phase, and using SMD solvation models of water and pentyl ethanoate.

| Protonation state | Site  | Gas phase |     | Water |     | Pentyl ethanoate |     |
|-------------------|-------|-----------|-----|-------|-----|------------------|-----|
|                   |       | BDE       | IP  | BDE   | IP  | BDE              | IP  |
| 5- <i>O</i> anion | 4'-OH | 371       | 674 | 382   | 456 | 371              | 505 |
|                   | 7-OH  | 357       |     | 383   |     | 363              |     |

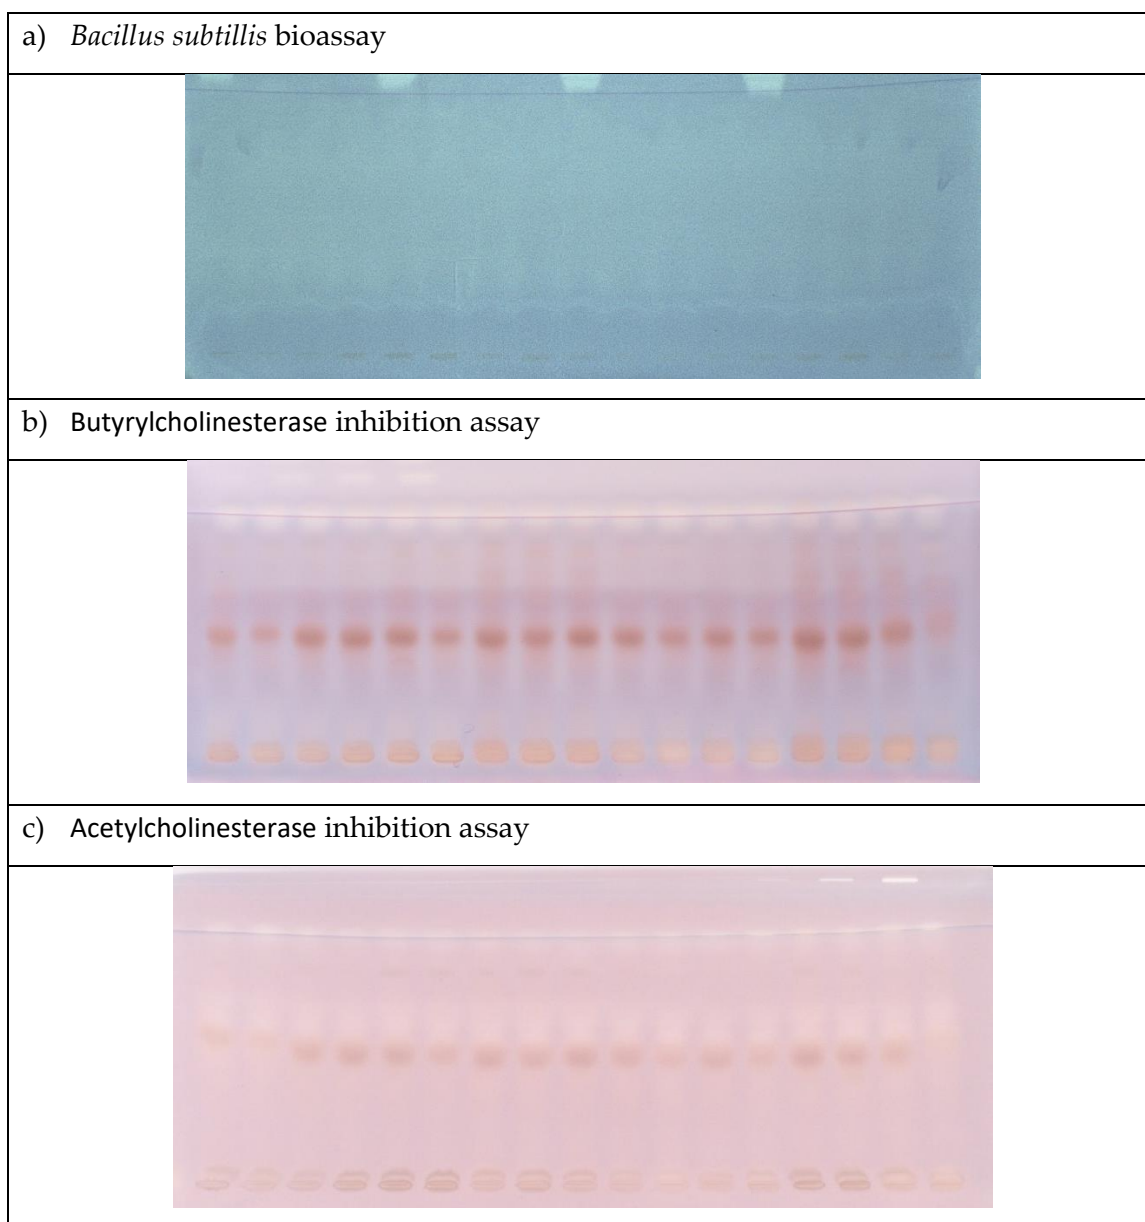

**Figure S1.** HPTLC profiles of 17 samples of six strawberry cultivars after (a) *Bacillus subtilis* bioassay, (b) acetylcholinesterase and (c) butyrylcholinesterase inhibition assays; respective positive controls of each assay are evident at the upper plate part

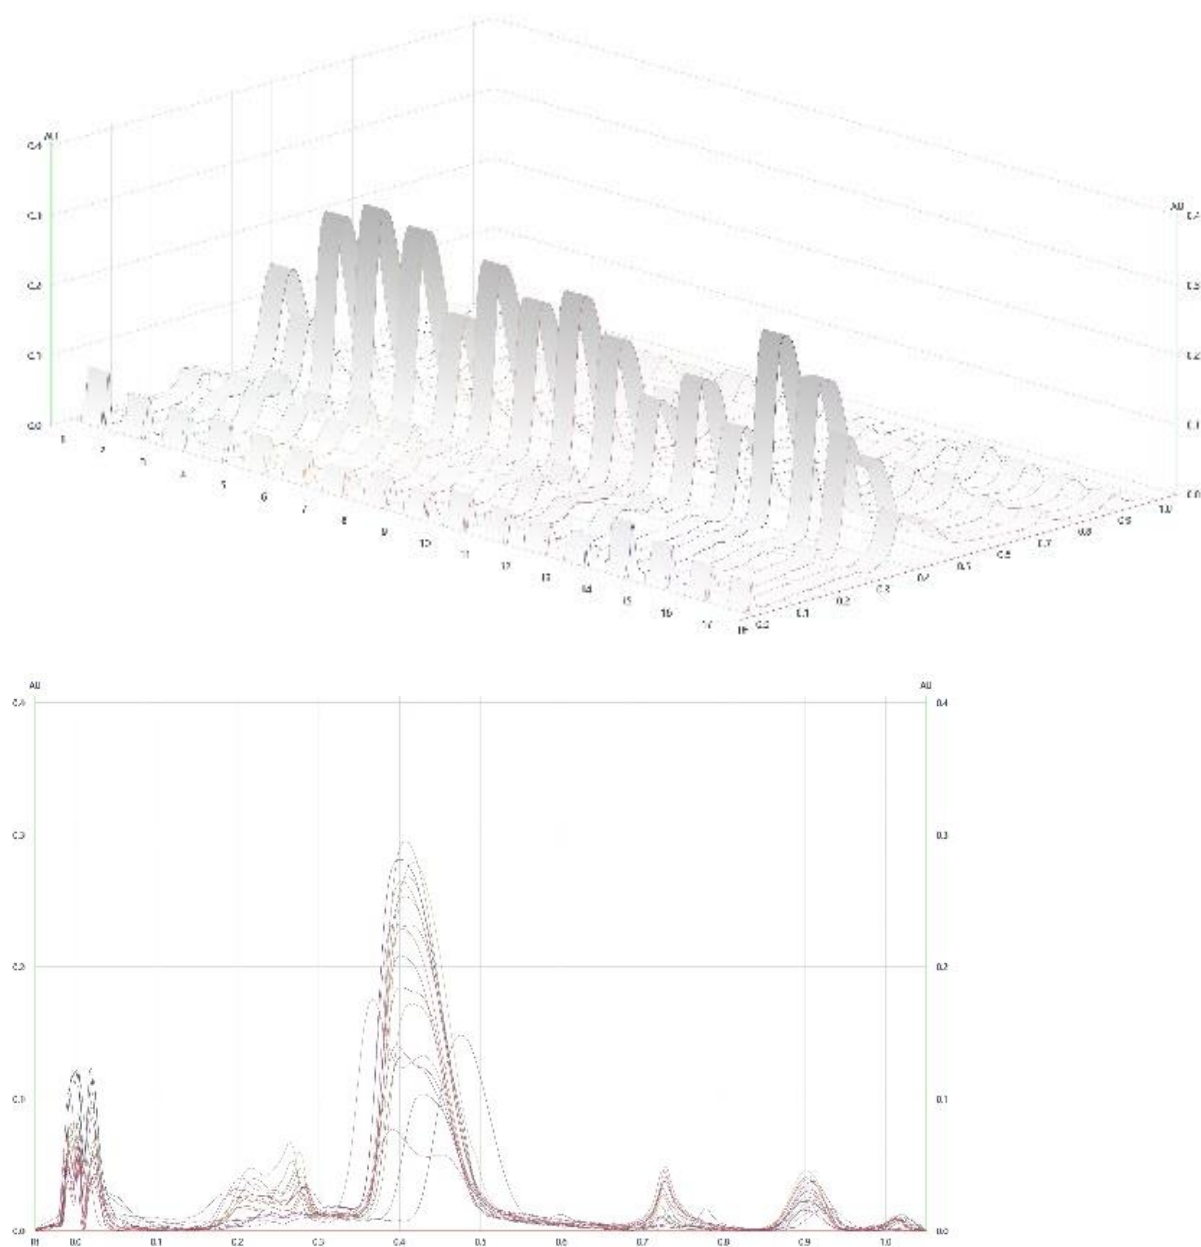

**Figure S2.** HPTLC densitogram of the absorbance measurement at 500 nm of 17 samples of six strawberry cultivars

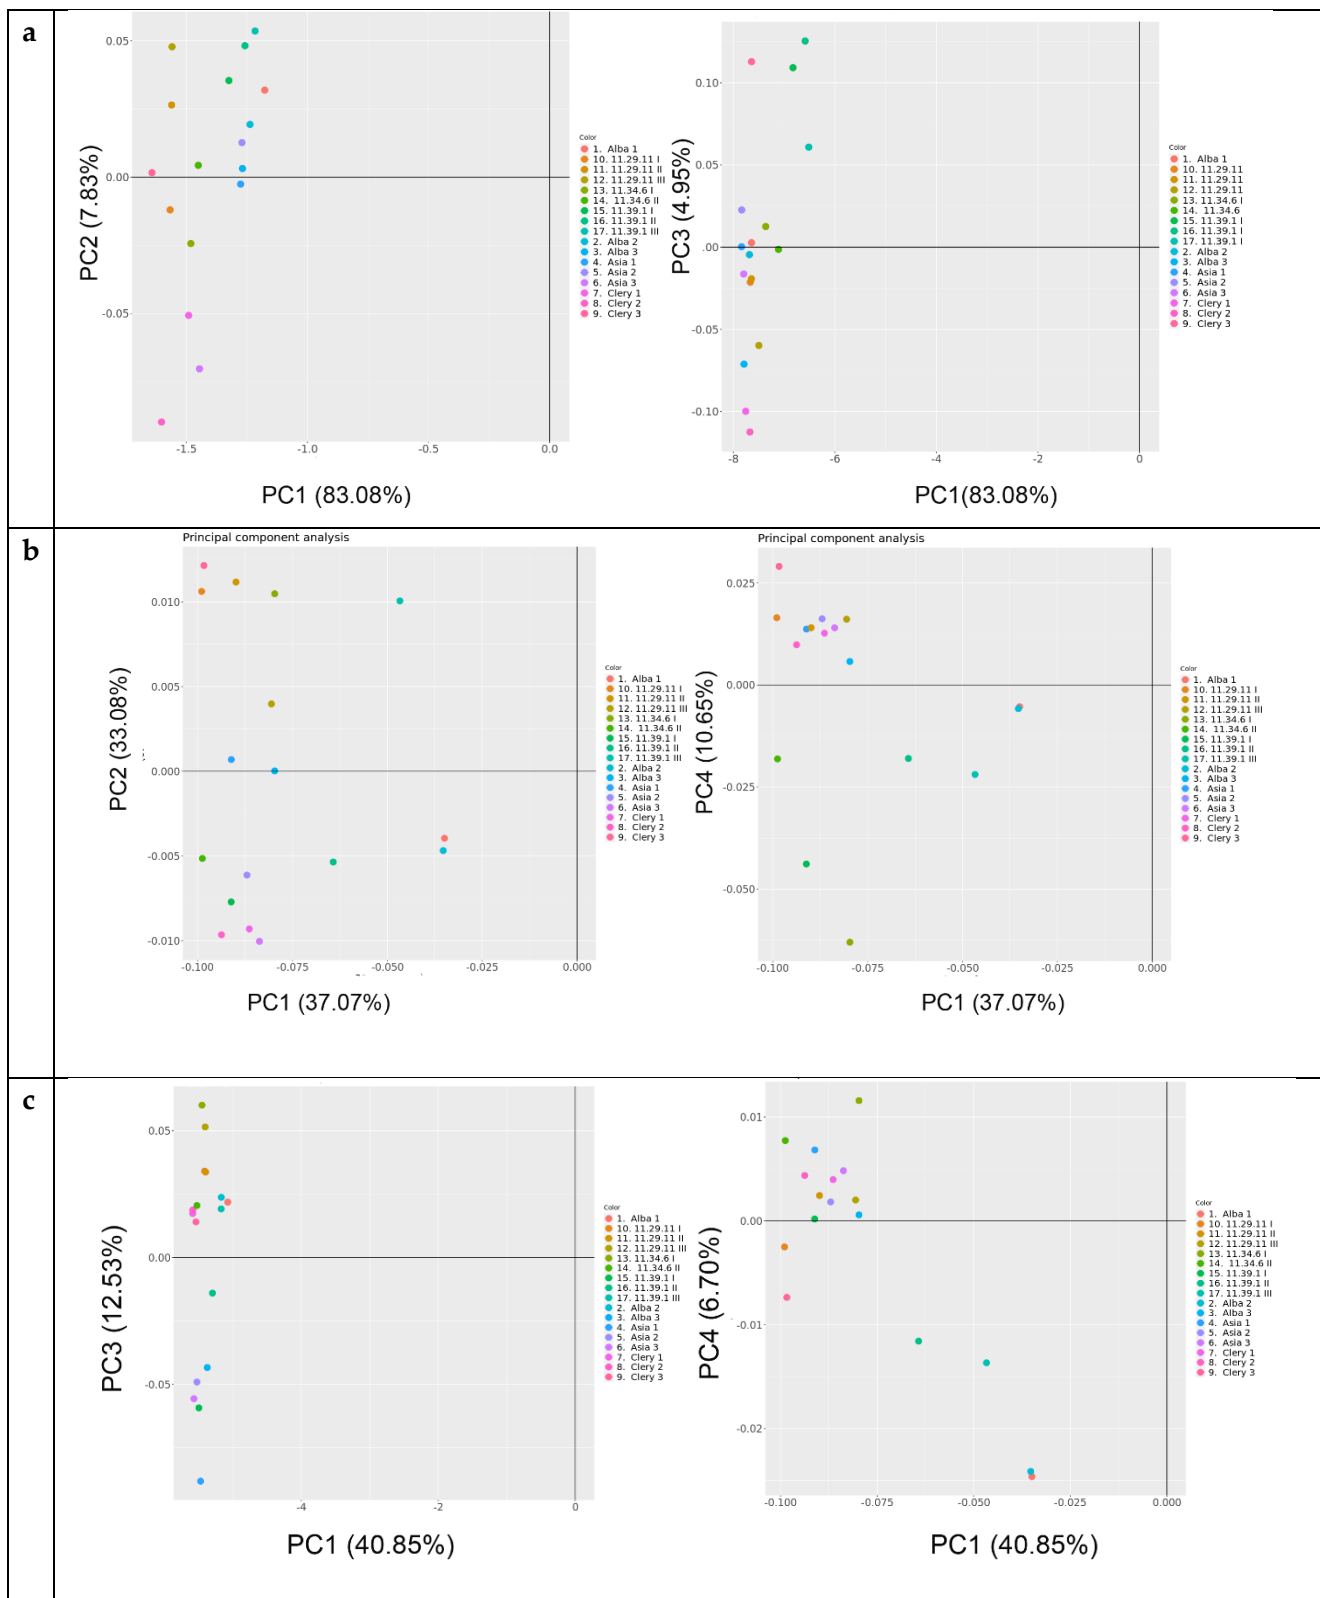

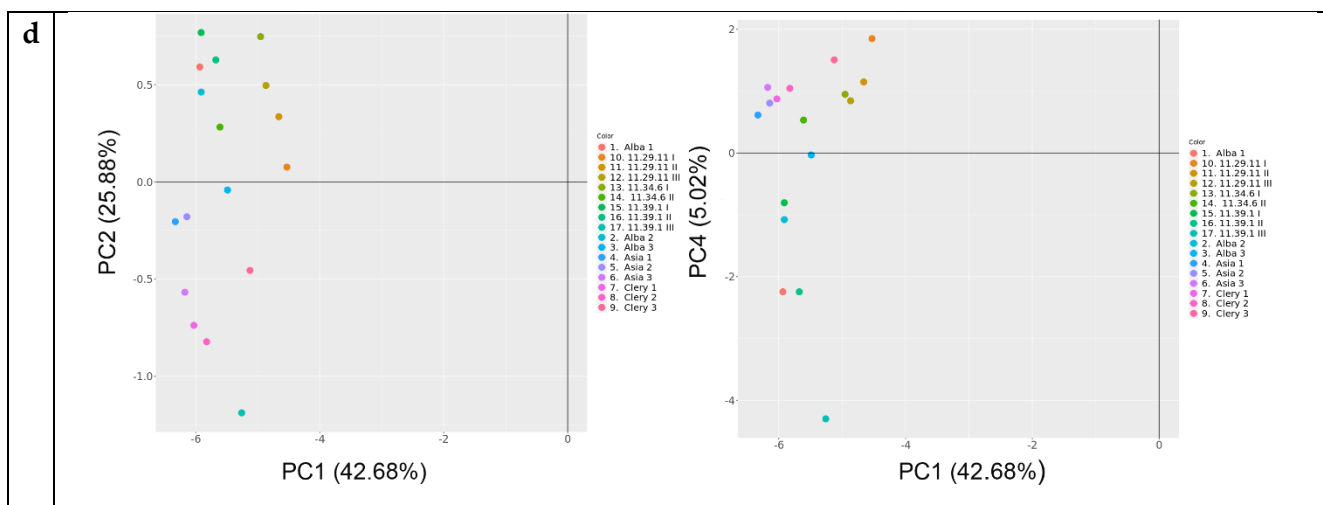

**Figure S3.** PCs score plots based on chromatogram at white light illumination (a), chromatogram at 254 nm absorbance (b), DPPH• scavenging autogram (c), and *Aliivibrio fischeri* bioautogram (d)
